# Supplementary material for: Automated workflow for the cell cycle analysis of (non-)adherent cells using a machine learning approach
Source: eLife. 2024 Nov 22;13:RP94689. doi: 10.7554/eLife.94689 (PMC11584176; doi:10.7554/eLife.94689)
Supplement: Supplementary file 1. — This is the table of the spots that is generated after the execution of the tracking script, that automatize TrackMate plugin. For more available parameters and information, please refer to: TrackMate (https://imagej.net/plugins/trackmate/) and Scripting TrackMate (https://imagej.net/plugins/trackmate/scripting/scripting). [file elife-94689-supp1.xlsx]

## Sheet: Foglio1
Column label	Description			This is the table of the spots that is generated after the execution of the tracking script, that automatize TrackMate plugin. For more available parameters and information, please refer to:
SPOTS_ID	id number of the spot in track			TrackMate	https://imagej.net/plugins/trackmate/
QUALITY	quality parameter of the spot			Scripting TrackMate	https://imagej.net/plugins/trackmate/scripting/scripting
POSITION_X	x coordinate of the spot
POSITION_Y	y coordinate of the spot
FRAME	frame at which the spot was identified
MEAN_INTENSITY_CH1	Mean fluorescence intensity of spot in the Red channel
MEAN_INTENSITY_CH2	Mean fluorescence intensity of spot in the Green channel
MEAN_INTENSITY_CH3	Mean fluorescence intensity of spot in the Brightness channel
MEAN_INTENSITY_CH4	Mean fluorescence intensity of spot in the Hue channel
